# Supplementary material for: Higher SARS-CoV-2 Spike Binding Antibody Levels and Neutralization Capacity 6 Months after Heterologous Vaccination with AZD1222 and BNT162b2
Source: MDPI journal article supplement (doi:10.3390/vaccines10020322), 2022-02-17
Supplement: s1 [file s1]

**Table S1. anti-spike binding antibody units (BAU/mL)**

|                                                                       | AZD1222 / AZD1222       | AZD1222 / BNT162b2      | BNT162b2 / BNT162b2       | all (n=190)                |
|-----------------------------------------------------------------------|-------------------------|-------------------------|---------------------------|----------------------------|
| <i><u>sex differences</u></i>                                         |                         |                         |                           |                            |
| male: median (min-max)                                                | 562.3 (98.8 – 2140)     | 2029 (1092 – 4273)      | 824.6 (137.6 – 2206)      | 830 (98.8 – 4273)          |
| female: median (min-max)                                              | 403.8 (35.6 – 3023)     | 2234.5 (199.2 – 24762)  | 661.9 (178.9 – 2580)      | 968.5 (35.6 – 24762)       |
| p (Mann-Whitney U test)                                               | 0.1266                  | 0.8492                  | 0.5875                    | 0.1959                     |
| <i><u>correlation with age</u></i>                                    |                         |                         |                           |                            |
| r (spearman rank)                                                     | r = -0.1220 95%         | r = -0.07360            | <b>r = -0.3989</b>        | <b>r = -0.2338</b>         |
| 95 % CI                                                               | -0.3693 to 0.1415       | -0.3224 to 0.1847       | <b>-0.5894 to -0.1665</b> | <b>-0.3677 to -0.09033</b> |
| p-value                                                               | 0.3490                  | 0.5665                  | <b>0.0009</b>             | <b>0.0012</b>              |
| <i><u>correlation with % neutralization capacity</u></i>              |                         |                         |                           |                            |
| r (spearman rank)                                                     | <b>r = 0.4718</b>       | <b>r = 0.6701</b>       | <b>r = 0.8032</b>         | <b>r = 0.8033</b>          |
| 95 % CI                                                               | <b>0.2425 to 0.6513</b> | <b>0.5007 to 0.7900</b> | <b>0.6927 to 0.8768</b>   | <b>0.7444 to 0.8498</b>    |
| p-value                                                               | <b>0.0001</b>           | <b>&lt; 0.0001</b>      | <b>&lt; 0.0001</b>        | <b>&lt; 0.0001</b>         |
| <i><u>correlation with IFN<math>\gamma</math>-producing spots</u></i> |                         |                         |                           |                            |
| r (spearman rank)                                                     | r = -0.09428            | r = 0.1767              | r = 0.1738                | r = 0.1125                 |

|         |                   |                    |                    |                    |
|---------|-------------------|--------------------|--------------------|--------------------|
| 95 % CI | -0.3449 to 0.1688 | -0.08177 to 0.4130 | -0.07860 to 0.4052 | -0.03459 to 0.2549 |
| p-value | 0.4698            | 0.1658             | 0.1629             | 0.1222             |

**Table S2. anti-RBD (Wuhan-Hu-1) neutralizing capacity (%)**

|                                                                       | AZD1222 / AZD1222 | AZD1222 / BNT162b2 | BNT162b2 / BNT162b2        | all (n=190)                |
|-----------------------------------------------------------------------|-------------------|--------------------|----------------------------|----------------------------|
| <i><u>sex differences</u></i>                                         |                   |                    |                            |                            |
| male: median (min-max)                                                | 71 (33-95)        | 93 (91 – 96)       | 87 (38 – 93)               | 85 (33 – 96)               |
| female: median (min-max)                                              | 51 (16 – 88)      | 94 (60 – 96)       | 87 (49 – 94)               | 87 (16 – 96)               |
| p (Mann-Whitney U test)                                               | 0.0558            | 0.4490             | 0.9122                     | 0.4130                     |
| <i><u>correlation with age</u></i>                                    |                   |                    |                            |                            |
| r (spearman rank)                                                     | r = -0.1259       | -0.05884           | <b>r = -0.3307</b>         | <b>r = -0.1870</b>         |
| 95 % CI                                                               | -0.3727 to 0.1376 | -0.3090 to 0.1990  | <b>-0.5355 to -0.08903</b> | <b>-0.3246 to -0.04159</b> |
| p-value                                                               | 0.3337            | 0.6469             | <b>0.0067</b>              | <b>0.0098</b>              |
| <i><u>correlation with IFN<math>\gamma</math>-producing spots</u></i> |                   |                    |                            |                            |
| r (spearman rank)                                                     | r = 0.1137        | r = 0.008657       | r = 0.1316                 | r = 0.1216                 |

|         |                   |                   |                   |                    |
|---------|-------------------|-------------------|-------------------|--------------------|
| 95 % CI | -0.1497 to 0.3620 | -0.2467 to 0.2629 | -0.1213 to 0.3685 | -0.02538 to 0.2634 |
| p-value | 0.3831            | 0.9463            | 0.2923            | 0.0947             |

**Table S3. anti-RBD (Delta B.1.617.2 variant) neutralizing capacity (%)**

|                             | AZD1222 / AZD1222   | AZD1222 / BNT162b2 | BNT162b2 / BNT162b2       | all (n=190)                |
|-----------------------------|---------------------|--------------------|---------------------------|----------------------------|
| <i>sex differences</i>      |                     |                    |                           |                            |
| male: median (min-max)      | <b>69 (37-93)</b>   | 93 (85 – 96)       | 88 (44 – 96)              | 85 (37 – 96)               |
| female: median (min-max)    | <b>60.8 (18-87)</b> | 94 (64 – 96)       | 85 (56 – 96)              | 85 (18 – 96)               |
| p (Mann-Whitney U test)     | <b>0.038</b>        | 0.9207             | 0.7359                    | 0.5556                     |
| <i>correlation with age</i> |                     |                    |                           |                            |
| r (spearman rank)           | r = -0.08332        | -0.02527           | <b>r = -0.2742</b>        | <b>r = -0.1584</b>         |
| 95 % CI                     | -0.3351 to 0.1795   | -0.2783 to 0.2310  | <b>-0.4897 to -0.2712</b> | <b>-0.2980 to -0.01217</b> |
| p-value                     | 0.5232              | 0.8441             | <b>0.0259</b>             | <b>0.0290</b>              |

*correlation with IFN $\gamma$ -producing spots*

|                   |                   |                   |                   |                    |
|-------------------|-------------------|-------------------|-------------------|--------------------|
| r (spearman rank) | r = 0.004285      | r = 0.09498       | r = 0.2242        | r = 0.1238         |
| 95 % CI           | -0.2550 to 0.2630 | -0.1638 to 0.3415 | -0.0262 to 0.4482 | -0.02318 to 0.2655 |
| p-value           | 0.9739            | 0.4590            | 0.0703            | 0.0888             |

**Table S4. IFN $\alpha$ -producing spots**

|                             | AZD1222 / AZD1222 | AZD1222 / BNT162b2 | BNT162b2 / BNT162b2 | all (n=190)  |
|-----------------------------|-------------------|--------------------|---------------------|--------------|
| <i>sex differences</i>      |                   |                    |                     |              |
| male: median (min-max)      | 74 (0 – 102)      | 75 (42 – 120)      | 54 (6 – 87)         | 67 (0 – 120) |
| female: median (min-max)    | 63 (0 – 106)      | 72.5 (5 – 123)     | 58 (6 – 115)        | 67 (0 – 123) |
| p (Mann-Whitney U test)     | 0.6391            | 0,5321             | 0.2378              | 0.8676       |
| <i>correlation with age</i> |                   |                    |                     |              |
| r (spearman rank)           | r = 0.03235       | r = 0.02503        | r = -0.2037         | r = -0.06716 |

|         |                   |                   |                    |                    |
|---------|-------------------|-------------------|--------------------|--------------------|
| 95 % CI | -0.2286 to 0.2889 | -0.2313 to 0.2781 | -0.4308 to 0.04762 | -0.2116 to 0.08017 |
| p-value | 0.8045            | 0.8456            | 0.1008             | 0.3572             |

---
